# Supplementary material for: ACVR1 R206H cooperates with H3.1K27M in promoting diffuse intrinsic pontine glioma pathogenesis
Source: PubMed Central journal article supplement (PMC6399349; doi:10.1038/s41467-019-08823-9), 2019-03-04

# Hoeman et al. Figure 1 Western blots

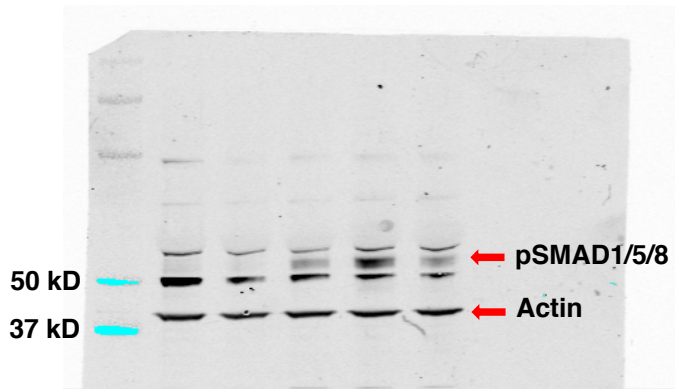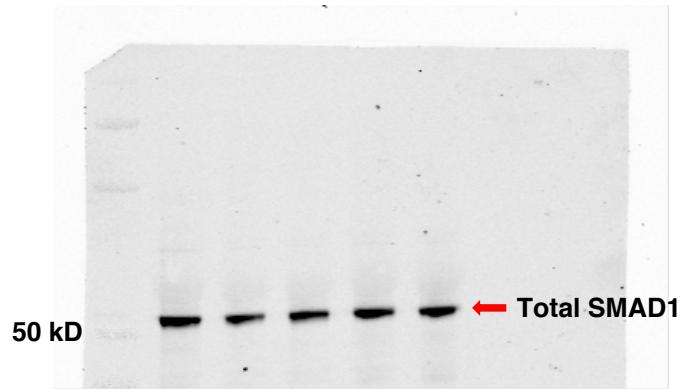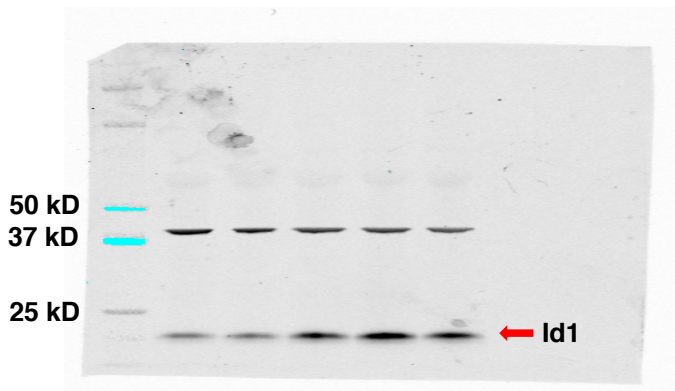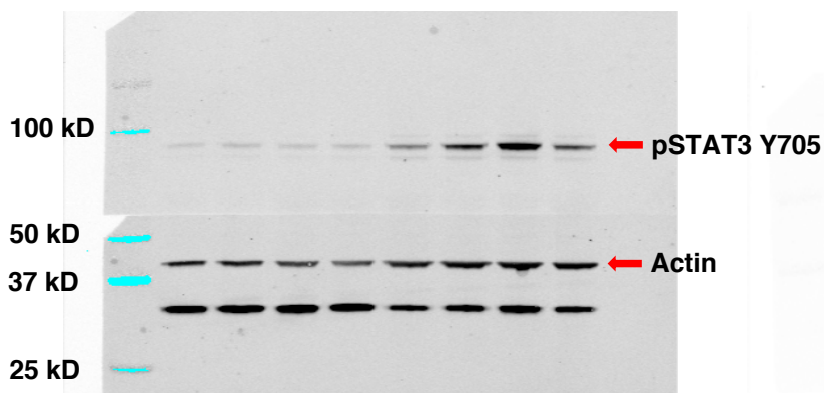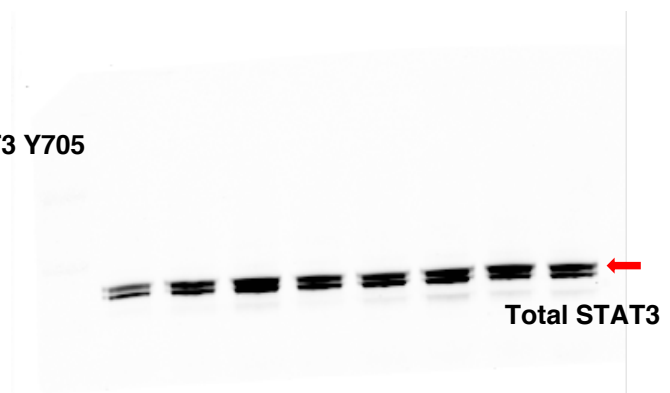

# Hoeman et al. Figure 5 Western blots

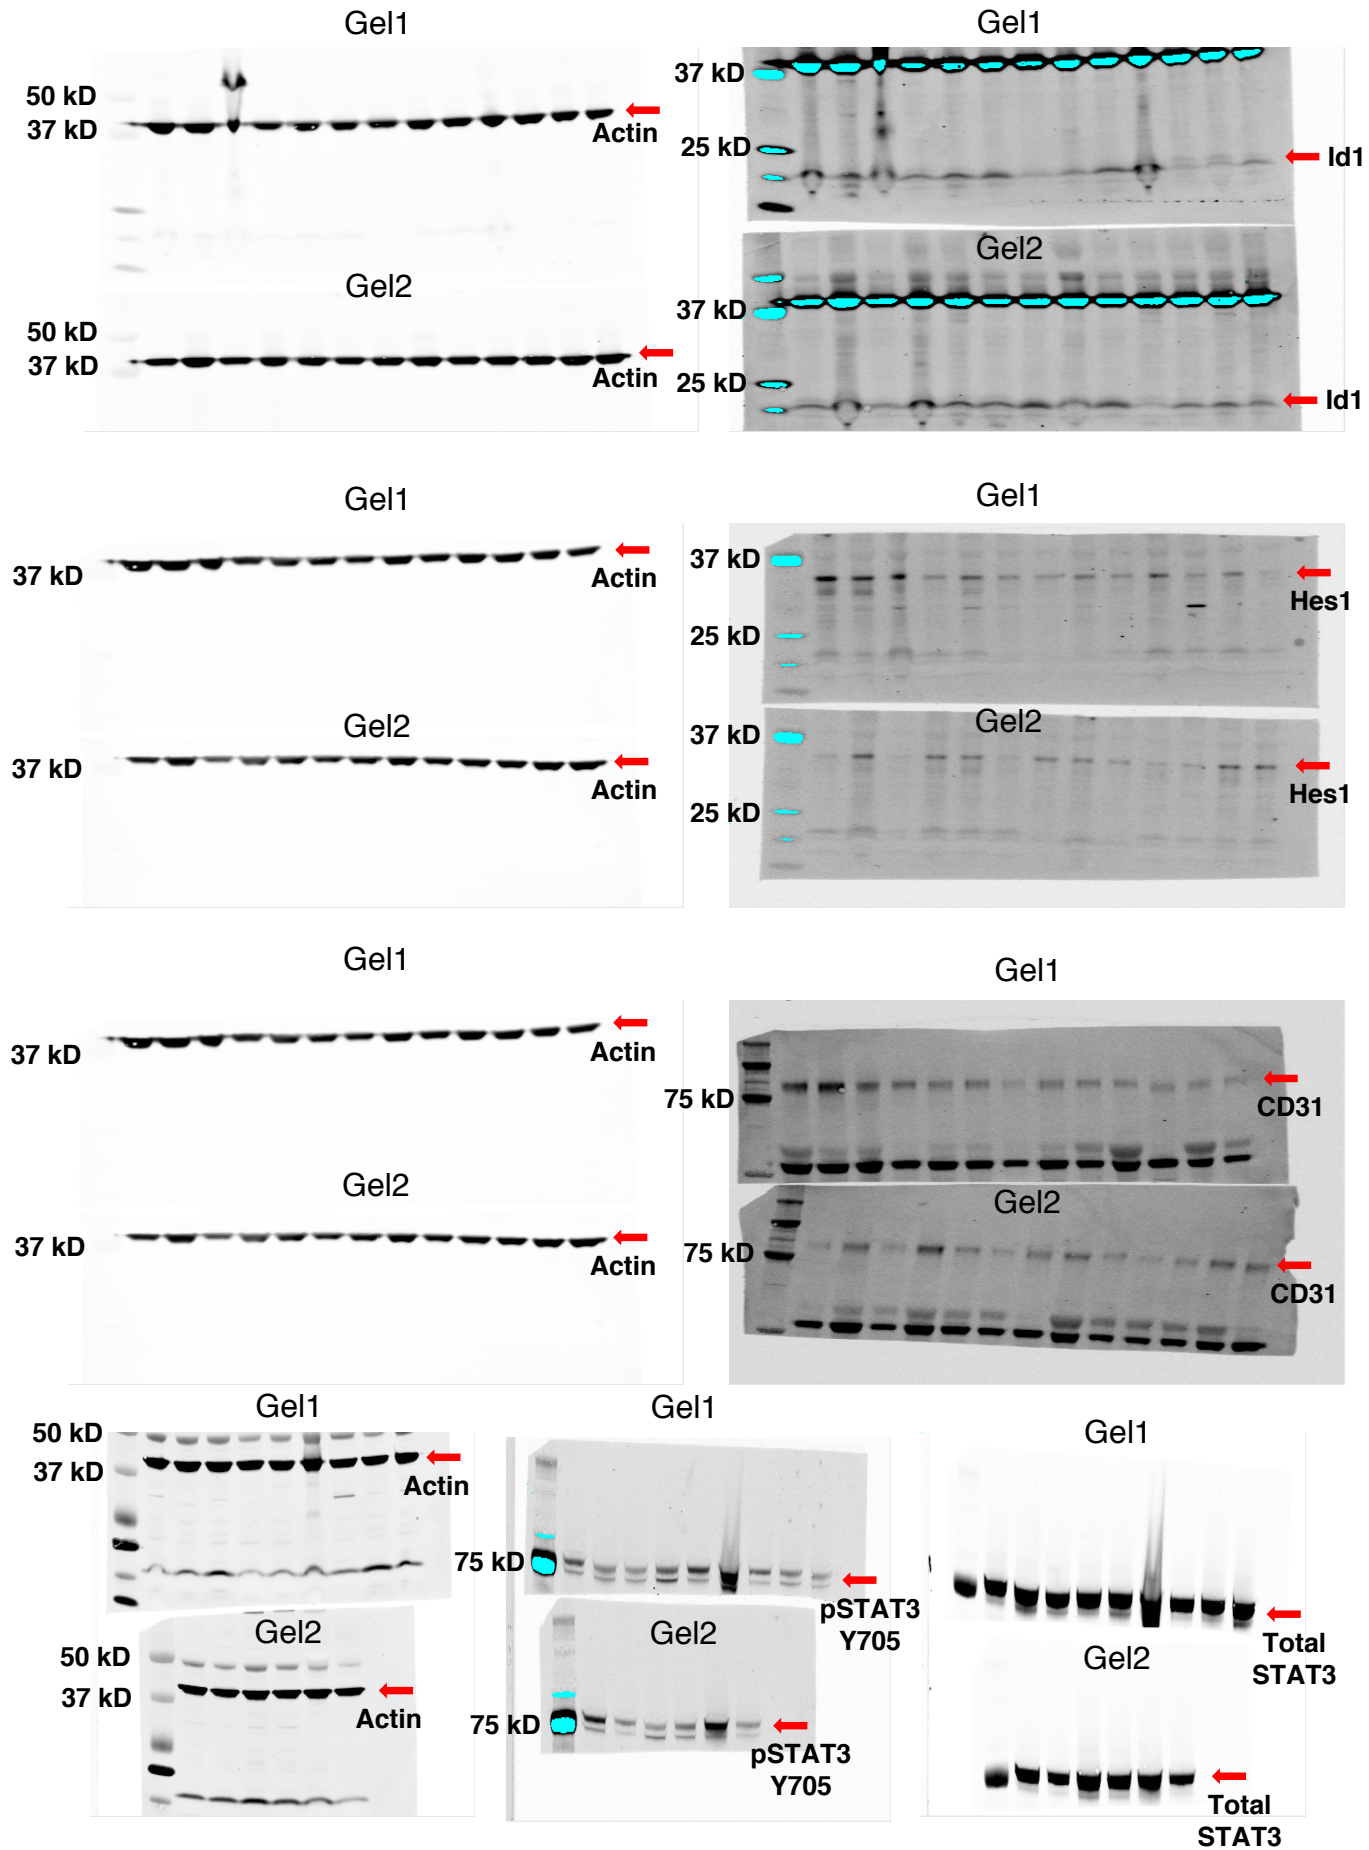

# Hoeman et al. Figure 6 Western blots

Human Lysates

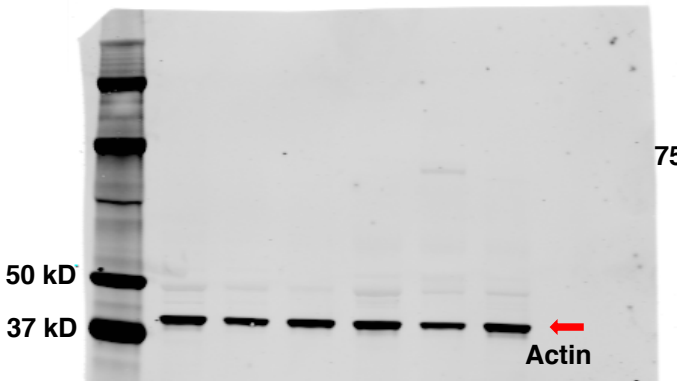

Human Lysates

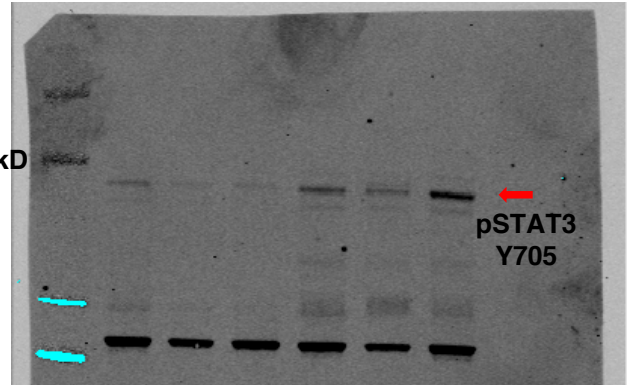

Human Lysates

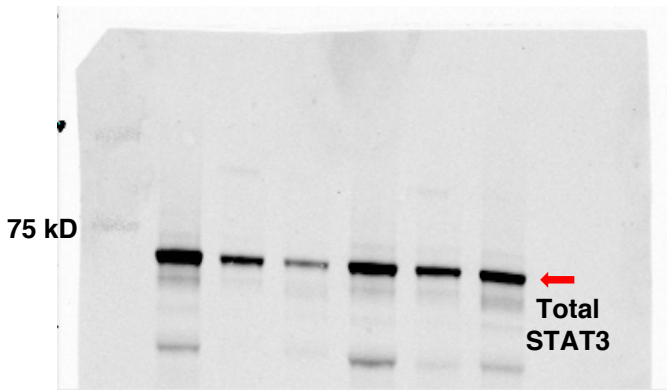

LDN212854 Treated Lines (Mouse)

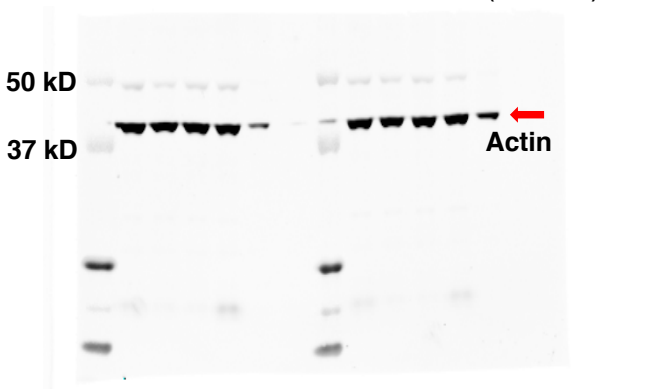

LDN212854 Treated Lines (Mouse)

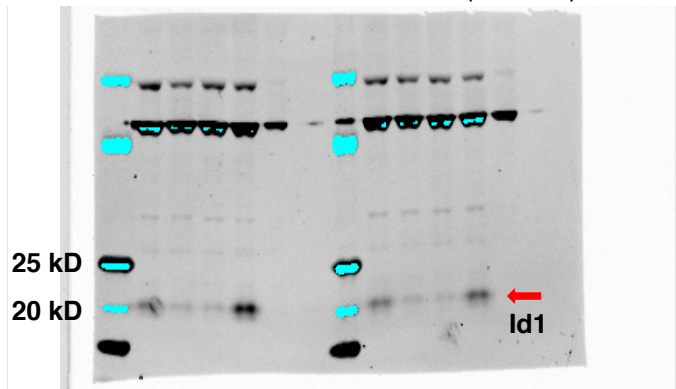

LDN212854 Treated Lines (Human)

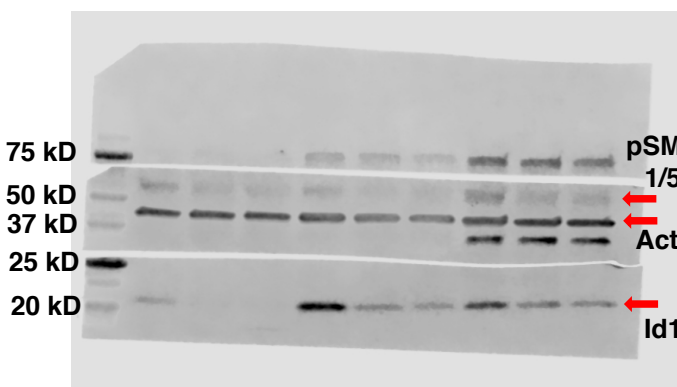

LDN212854 Treated Lines (Human)

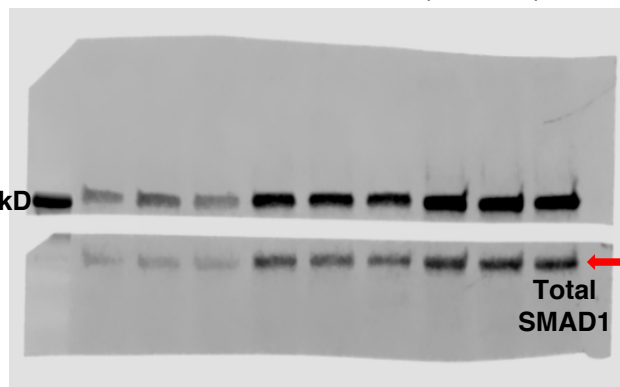

# Hoeman et al. Supplementary Figure 1 Western blots

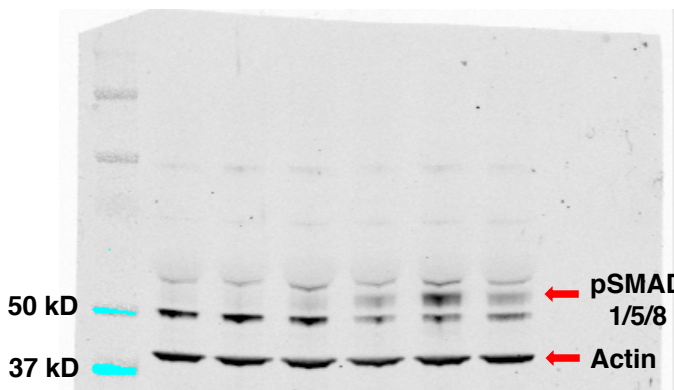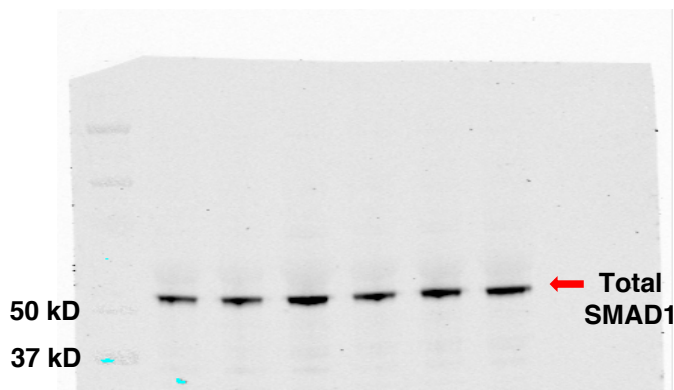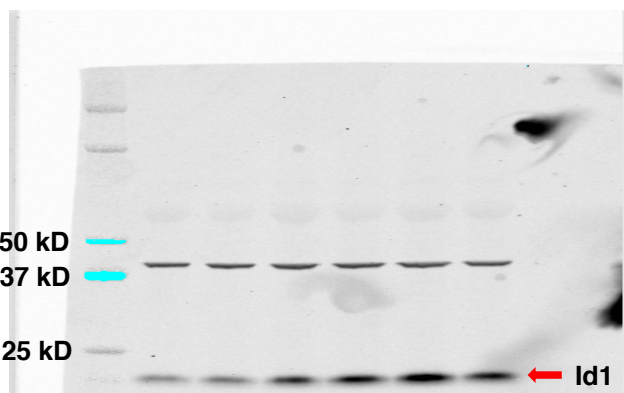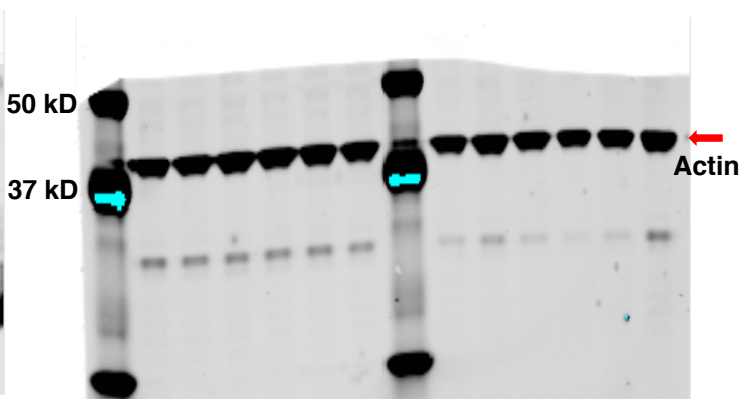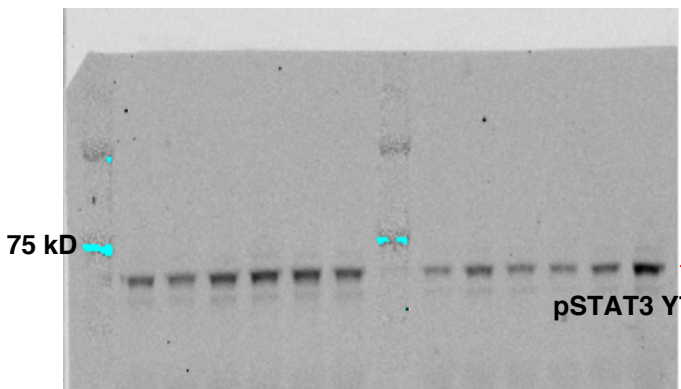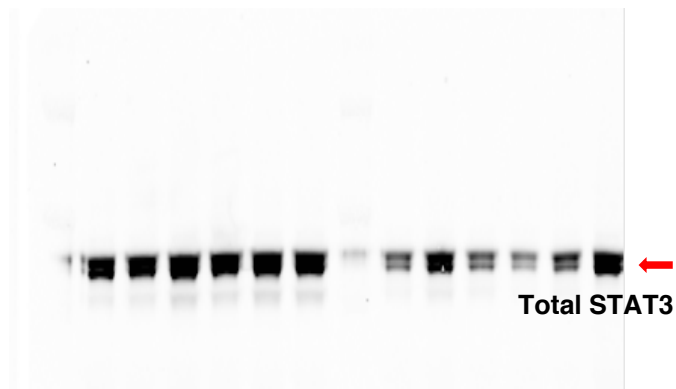

# Hoeman et al. Supplementary Figure 4 Western blots

LDN214117 Treated Lines (Mouse)

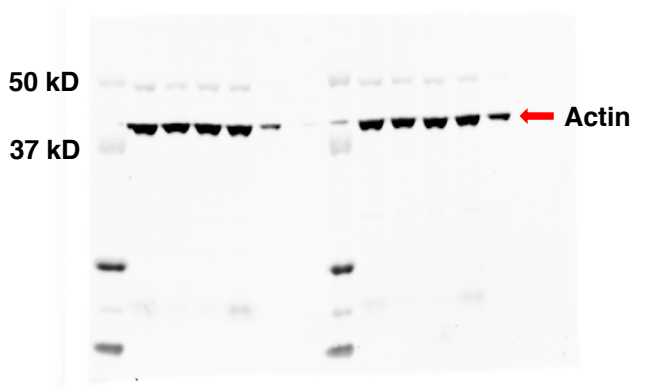

LDN214117 Treated Lines (Mouse)

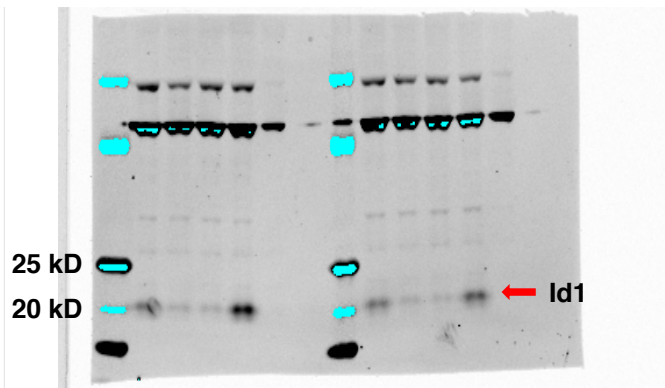

LDN214117 Treated Lines (Human)

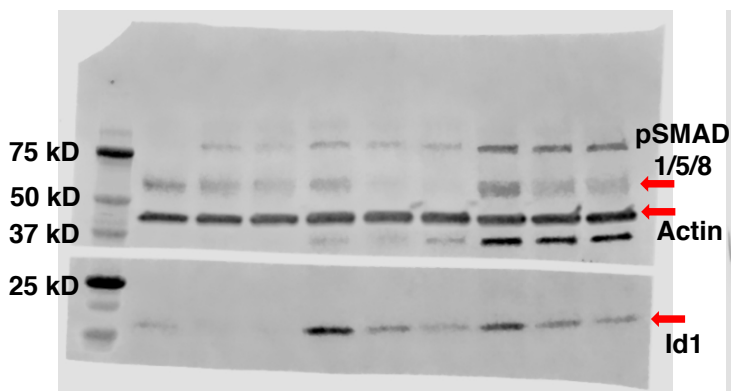

LDN214117 Treated Lines (Human)

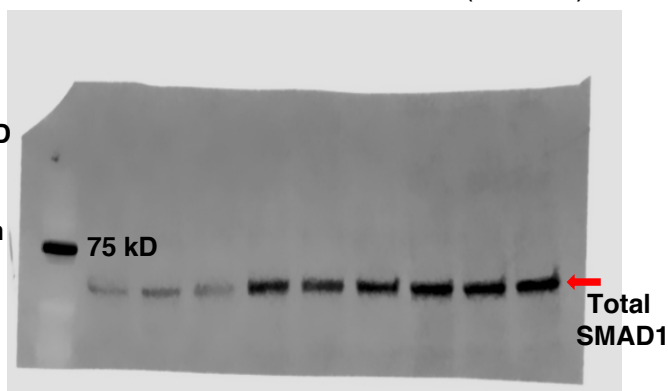

Supplement: 41467_2019_8823_MOESM6_ESM.pdf [file 41467_2019_8823_MOESM6_ESM.pdf]
