# Supplementary material for: ACVR1 R206H cooperates with H3.1K27M in promoting diffuse intrinsic pontine glioma pathogenesis
Source: PubMed Central journal article supplement (PMC6399349; doi:10.1038/s41467-019-08823-9), 2019-03-04
Supplement: 41467_2019_8823_MOESM3_ESM.pdf [file 41467_2019_8823_MOESM3_ESM.pdf]

## **Description of Additional Supplementary Files**

File Name: Supplementary Data 1

Description: Lists of significantly differentially expressed genes in ACVR1 R206H infected neurospheres compared to ACVR1 WT infected neurospheres, with and without H3.1K27M, as determined by RNAseq analysis.

File Name: Supplementary Data 2

Description: GSEA analysis results of ACVR1 R206H infected neurospheres compared to ACVR1 WT infected neurospheres, with and without H3.1K27M, as determined by RNAseq analysis.

File Name: Supplementary Data 3

Description: Uncropped and unprocessed Western blot gels of representative images.

File Name: Supplementary Data 4

Description: Validation of human cells lines using short tandem repeat analysis
