# Supplementary material for: ACVR1 R206H cooperates with H3.1K27M in promoting diffuse intrinsic pontine glioma pathogenesis
Source: PubMed Central journal article supplement (PMC6399349; doi:10.1038/s41467-019-08823-9), 2019-03-04
Supplement: 41467_2019_8823_MOESM8_ESM.pdf [file 41467_2019_8823_MOESM8_ESM.pdf]

## Reporting Summary

Nature Research wishes to improve the reproducibility of the work that we publish. This form provides structure for consistency and transparency in reporting. For further information on Nature Research policies, see [Authors & Referees](#) and the [Editorial Policy Checklist](#).

### Statistics

For all statistical analyses, confirm that the following items are present in the figure legend, table legend, main text, or Methods section.

n/a Confirmed

- The exact sample size ( $n$ ) for each experimental group/condition, given as a discrete number and unit of measurement
- A statement on whether measurements were taken from distinct samples or whether the same sample was measured repeatedly
- The statistical test(s) used AND whether they are one- or two-sided  
*Only common tests should be described solely by name; describe more complex techniques in the Methods section.*
- A description of all covariates tested
- A description of any assumptions or corrections, such as tests of normality and adjustment for multiple comparisons
- A full description of the statistical parameters including central tendency (e.g. means) or other basic estimates (e.g. regression coefficient) AND variation (e.g. standard deviation) or associated estimates of uncertainty (e.g. confidence intervals)
- For null hypothesis testing, the test statistic (e.g.  $F$ ,  $t$ ,  $r$ ) with confidence intervals, effect sizes, degrees of freedom and  $P$  value noted  
*Give  $P$  values as exact values whenever suitable.*
- For Bayesian analysis, information on the choice of priors and Markov chain Monte Carlo settings
- For hierarchical and complex designs, identification of the appropriate level for tests and full reporting of outcomes
- Estimates of effect sizes (e.g. Cohen's  $d$ , Pearson's  $r$ ), indicating how they were calculated

*Our web collection on [statistics for biologists](#) contains articles on many of the points above.*

### Software and code

Policy information about [availability of computer code](#)

Data collection

Data analysis

For manuscripts utilizing custom algorithms or software that are central to the research but not yet described in published literature, software must be made available to editors/reviewers. We strongly encourage code deposition in a community repository (e.g. GitHub). See the Nature Research [guidelines for submitting code & software](#) for further information.

### Data

Policy information about [availability of data](#)

All manuscripts must include a [data availability statement](#). This statement should provide the following information, where applicable:

- Accession codes, unique identifiers, or web links for publicly available datasets
- A list of figures that have associated raw data
- A description of any restrictions on data availability

RNAseq data that support the findings of this study have been deposited in Geo Bank with Geo accession number GSE125627. The authors declare that data supporting the findings of this study are available within this published article and its supplementary information files. Data that supports the findings of this paper are available from the corresponding author upon reasonable request.

## Field-specific reporting

Please select the one below that is the best fit for your research. If you are not sure, read the appropriate sections before making your selection.

Life sciences  Behavioural & social sciences  Ecological, evolutionary & environmental sciences

For a reference copy of the document with all sections, see [nature.com/documents/nr-reporting-summary-flat.pdf](https://www.nature.com/documents/nr-reporting-summary-flat.pdf)

## Life sciences study design

All studies must disclose on these points even when the disclosure is negative.

|                 |                                                                                                                                                                                                                                                                                                                                                                                                                              |
|-----------------|------------------------------------------------------------------------------------------------------------------------------------------------------------------------------------------------------------------------------------------------------------------------------------------------------------------------------------------------------------------------------------------------------------------------------|
| Sample size     | For in vitro experiments, no sample size calculation was performed. In this case, a minimum of 3 biologically different samples were used for statistical analysis. It should be noted that in most cases, a minimum of 5 biologically different samples were used. Sample size for in vivo studies were based on power analysis that was performed previously in our lab using our this mouse modeling approach (RCAS/tv-a) |
| Data exclusions | All data was included for analysis, except for determining tumor grade. In this case, only tumors from euthanized animals were included for analysis. Tumors from found dead animals were excluded as to avoid false positives.                                                                                                                                                                                              |
| Replication     | To verify the reproducibility of the experimental findings, in vitro experiments were plated in triplicate wells and performed for a minimum of 3 separate experiments. For in vivo studies, a minimum of 3 infected litters with viral combination were performed. All attempts at replication were successful.                                                                                                             |
| Randomization   | Randomization was performed primarily for in vivo drug studies. Mice that were symptomatic at approximately the same age were included for these studies, and when possible, would be from the same litter.                                                                                                                                                                                                                  |
| Blinding        | Tumor presence and grading were determined by a blinded neuropathologist who was not aware which viral combination was used to infect the mouse brain to induce brain tumors                                                                                                                                                                                                                                                 |

## Reporting for specific materials, systems and methods

We require information from authors about some types of materials, experimental systems and methods used in many studies. Here, indicate whether each material, system or method listed is relevant to your study. If you are not sure if a list item applies to your research, read the appropriate section before selecting a response.

### Materials & experimental systems

| n/a                                 | Included in the study                                           |
|-------------------------------------|-----------------------------------------------------------------|
| <input type="checkbox"/>            | <input checked="" type="checkbox"/> Antibodies                  |
| <input type="checkbox"/>            | <input checked="" type="checkbox"/> Eukaryotic cell lines       |
| <input checked="" type="checkbox"/> | <input type="checkbox"/> Palaeontology                          |
| <input type="checkbox"/>            | <input checked="" type="checkbox"/> Animals and other organisms |
| <input type="checkbox"/>            | <input checked="" type="checkbox"/> Human research participants |
| <input checked="" type="checkbox"/> | <input type="checkbox"/> Clinical data                          |

### Methods

| n/a                                 | Included in the study                                      |
|-------------------------------------|------------------------------------------------------------|
| <input checked="" type="checkbox"/> | <input type="checkbox"/> ChIP-seq                          |
| <input checked="" type="checkbox"/> | <input type="checkbox"/> Flow cytometry                    |
| <input type="checkbox"/>            | <input checked="" type="checkbox"/> MRI-based neuroimaging |

## Antibodies

|                 |                                                                                                                                                                                                                                                                                                                                                                                                                                      |
|-----------------|--------------------------------------------------------------------------------------------------------------------------------------------------------------------------------------------------------------------------------------------------------------------------------------------------------------------------------------------------------------------------------------------------------------------------------------|
| Antibodies used | pSMAD1/5/8 Cell Signaling Technologies (#9511), pSMAD1/5/8 Millipore (AB3848-I), Total SMAD1 Cell Signaling Technologies (#9743), Actin Cell Signaling Technologies (#3700), Actin (I-19) Santa Cruz (sc-1616), Id1 BioCheck (BCH-1/37-2), Hes1 Cell Signaling Technologies (#11988), CD31 Abcam (ab28364), Phospho-Stat3 (Tyr705) (D3A7) XP Cell Signaling Technologies (#9145), Stat3 (D3Z2G) Cell Signaling Technologies (#12640) |
| Validation      | All antibodies used in this paper were validated by the manufacturer and have been cited in previous publications.                                                                                                                                                                                                                                                                                                                   |

## Eukaryotic cell lines

Policy information about [cell lines](#)

|                          |                                                                              |
|--------------------------|------------------------------------------------------------------------------|
| Cell line source(s)      | Cell lines were obtained from Rintaro Hashizume                              |
| Authentication           | STR authentication was performed                                             |
| Mycoplasma contamination | we confirm that all cell lines were tested for mycoplasma and were negative. |



Commonly misidentified lines  
(See [ICLAC](#) register)

none

## Animals and other organisms

Policy information about [studies involving animals](#); [ARRIVE guidelines](#) recommended for reporting animal research

|                         |                                                                                                                                                                                                                                                                                       |
|-------------------------|---------------------------------------------------------------------------------------------------------------------------------------------------------------------------------------------------------------------------------------------------------------------------------------|
| Laboratory animals      | Nestin-Tv-a (Ntv-a);p53fl/fl and Ntv-a; p53fl/fl;PTENfl/fl mice were used in this paper. Both female and male mice were included in data analysis. The use of neonatal (postnatal day 3) and adult mice were used for experiments.                                                    |
| Wild animals            | This study did not involve wild animals.                                                                                                                                                                                                                                              |
| Field-collected samples | This study did not involve samples collected from the field.                                                                                                                                                                                                                          |
| Ethics oversight        | All animals were used according to protocols approved at Duke University and Northwestern University Animal Care and Use Committee and the Guide for the Care and Use of Laboratory Animals (Animal Protocol A214-13-8 at Duke University and IS00005105 at Northwestern University). |

Note that full information on the approval of the study protocol must also be provided in the manuscript.

## Human research participants

Policy information about [studies involving human research participants](#)

|                            |                                                                                                                                                                                                                    |
|----------------------------|--------------------------------------------------------------------------------------------------------------------------------------------------------------------------------------------------------------------|
| Population characteristics | DIPG is a rare childhood brain tumor. Approximately 250 children get diagnosed with DIPG each year in the United States.                                                                                           |
| Recruitment                | DIPG is a rare tumor. Families of children with DIPG who were being treated at Children's National Medical Center were asked to consider tumor donation via autopsy when the treatment failed as DIPG is incurable |
| Ethics oversight           | Children's National Medical Center, IRB approved protocol, IRB-1339                                                                                                                                                |

Note that full information on the approval of the study protocol must also be provided in the manuscript.

## Magnetic resonance imaging

### Experimental design

|                                 |                                                                                                    |
|---------------------------------|----------------------------------------------------------------------------------------------------|
| Design type                     | MRI was used to help diagnose which mice had tumors.                                               |
| Design specifications           | Starting at 6 weeks post infection mice were scheduled for MRI to determine if a tumor was present |
| Behavioral performance measures | No behavioral performances were measured.                                                          |

### Acquisition

|                               |                                                                                                                                                                                                                                                                                                                                                                                                                                                                                                                                                                                                                                                                                                                                                                                                                                                                                                                                                                                                                                                                                                                                     |
|-------------------------------|-------------------------------------------------------------------------------------------------------------------------------------------------------------------------------------------------------------------------------------------------------------------------------------------------------------------------------------------------------------------------------------------------------------------------------------------------------------------------------------------------------------------------------------------------------------------------------------------------------------------------------------------------------------------------------------------------------------------------------------------------------------------------------------------------------------------------------------------------------------------------------------------------------------------------------------------------------------------------------------------------------------------------------------------------------------------------------------------------------------------------------------|
| Imaging type(s)               | structural                                                                                                                                                                                                                                                                                                                                                                                                                                                                                                                                                                                                                                                                                                                                                                                                                                                                                                                                                                                                                                                                                                                          |
| Field strength                | 7 Tesla                                                                                                                                                                                                                                                                                                                                                                                                                                                                                                                                                                                                                                                                                                                                                                                                                                                                                                                                                                                                                                                                                                                             |
| Sequence & imaging parameters | 10 minutes prior to scanning each mouse was injected intraperitoneally with gadolinium based MR contrast agent at 0.3mmol/kg to allow agent to reach the brain and enhance the tumor regions. Each mouse was then anesthetized using a mixture of isoflurane and 100% O2 and placed in an MR compatible cradle. MR images were acquired using a dedicated four channel mouse brain coil (Bruker, Germany). After initial localization sequences (tri-axial gradient echo sequences) a series of 2D images were acquired using T2 weighted Multi Spin Echo sequences in all 3 directions (transverse, longitudinal, and sagittal) with TR=2000 msec and TE= 40 msec with a spatial resolution of approximately 80 microns and slice thickness of 0.7mm. Finally, a 3D gradient T1 weighted echo sequence with isotropic resolution 150 microns was acquired with TR=40 msec, TE= 3msec and Flip Angle FA = 10 yielding high resolution 3D picture of the brain of each mouse. Post-acquisition inspection of the set of 2D and 3D images enabled assessment of morphological abnormalities associated with detection of tumor masses |
| Area of acquisition           | Brain                                                                                                                                                                                                                                                                                                                                                                                                                                                                                                                                                                                                                                                                                                                                                                                                                                                                                                                                                                                                                                                                                                                               |
| Diffusion MRI                 | <input type="checkbox"/> Used <input checked="" type="checkbox"/> Not used                                                                                                                                                                                                                                                                                                                                                                                                                                                                                                                                                                                                                                                                                                                                                                                                                                                                                                                                                                                                                                                          |

### Preprocessing

|                        |                          |
|------------------------|--------------------------|
| Preprocessing software | Not applicable           |
| Normalization          | Data was not normalized. |

Normalization template *Describe the template used for normalization/transformation, specifying subject space or group standardized space (e.g. original Talairach, MNI305, ICBM152) OR indicate that the data were not normalized.*

Noise and artifact removal **Noise and artifact were not removed**

Volume censoring **No volume censoring was performed**

### Statistical modeling & inference

Model type and settings **No statistical modeling was used.**

Effect(s) tested **MRI was strictly used to determine if a tumor was present for the preclinical trial**

Specify type of analysis:  Whole brain  ROI-based  Both

Statistic type for inference (See [Eklund et al. 2016](#)) *Specify voxel-wise or cluster-wise and report all relevant parameters for cluster-wise methods.*

Correction *Describe the type of correction and how it is obtained for multiple comparisons (e.g. FWE, FDR, permutation or Monte Carlo).*

### Models & analysis

n/a | Involved in the study

Functional and/or effective connectivity

Graph analysis

Multivariate modeling or predictive analysis
